# Supplementary material for: Ethanol-induced ammonium polyphosphate–silver gel paint: breaking the trade-off between conductivity, flame retardancy and adhesion in single-layer functional coatings
Source: Royal Society of Chemistry journal article supplement (doi:10.1039/d4mh01684j), 2025-01-01
Supplement: d4mh01684j1.pdf [file d4mh01684j1.pdf]

## Supporting Information

Ethanol-induced ammonium polyphosphate-silver gels paint: breaking the trade-off between conductivity, flame retardancy and adhesion in single-layer functional coatings

Zilong Wang, Wanze Wu, Xiao Gong\*

State Key Laboratory of Silicate Materials for Architectures, Wuhan University of Technology, Wuhan 430070, P. R. China.

\* Corresponding author:

**E-mail address:** [xgong@whut.edu.cn](mailto:xgong@whut.edu.cn) (X. Gong)

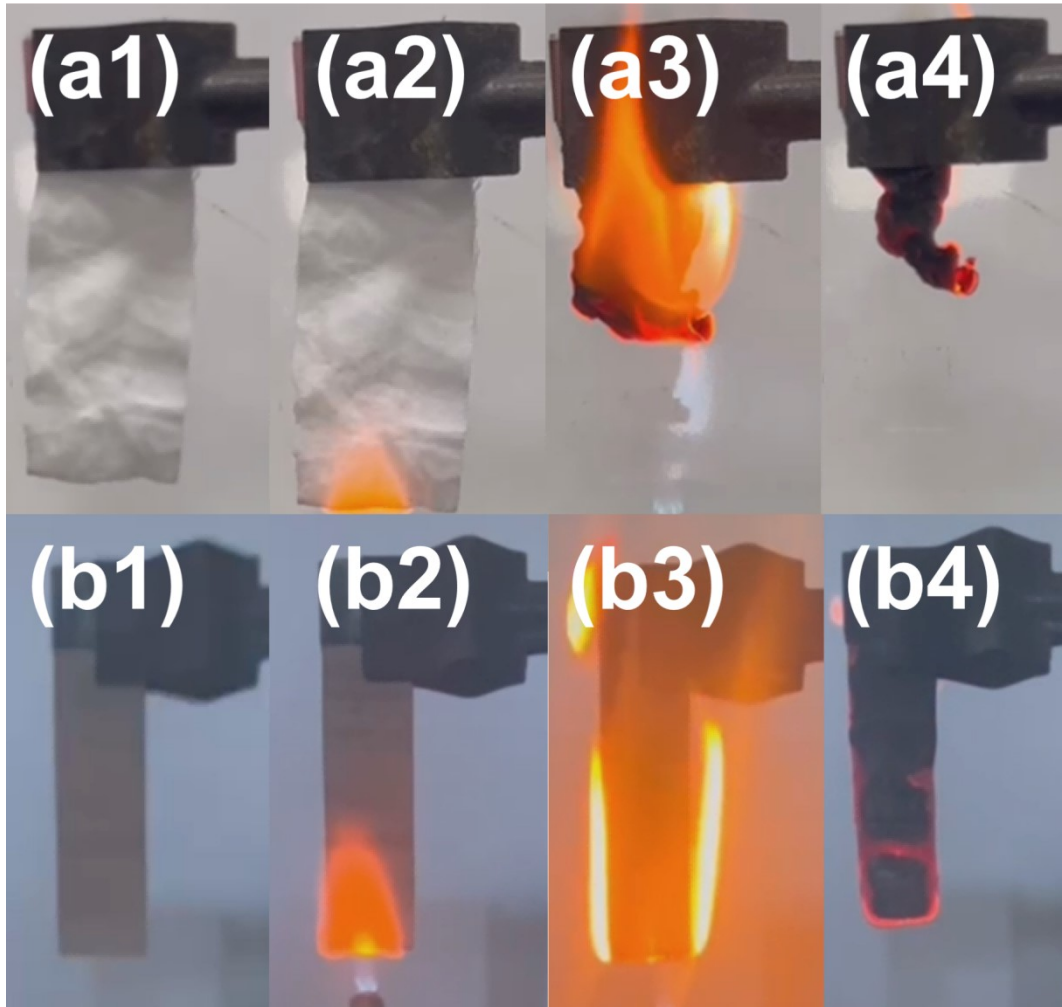

**Figure S1.** Photographs of uncoated cotton fabric (a1-a4) and uncoated wood (b1-b4) during vertical burning test.

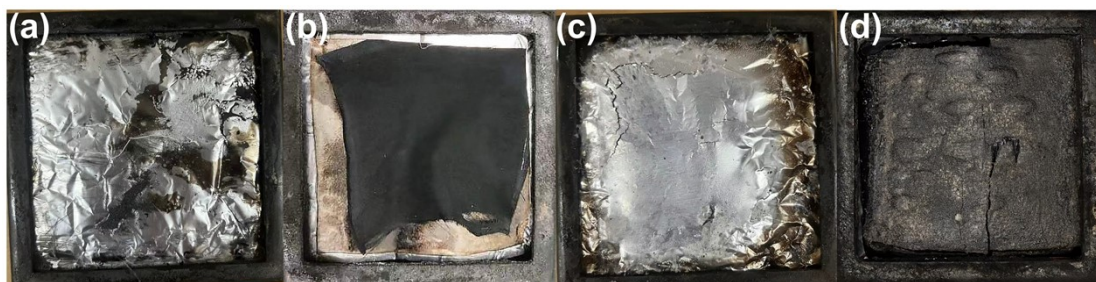

**Figure S2.** Photographs of the cotton fabric (a), coated cotton fabric (b), wood (c) and coated wood (d) after the cone calorimetry test.

**Table S1.** The combination property of this work compared to that of the article.

| Ref.                                 | Method          | Substrate                     | LOI (%)   | $\Delta$ PHRR (%) | $\Delta$ THR (%) | Conductivity       | Fire alarm |
|--------------------------------------|-----------------|-------------------------------|-----------|-------------------|------------------|--------------------|------------|
| Ding et al. <sup>1</sup> 2023        | One-step        | Cotton/lyocell blended fabric | 30.8      | 65.7              | 15.8             | 26.8 S/m           | NG         |
| Abdelkhalik et al. <sup>2</sup> 2024 | One-step        | Cotton fabric                 | 26.9      | NG                | NG               | 0.0000095 S/m      | NG         |
| Attia et al. <sup>3</sup> 2023       | One-step        | fabric                        | NG        | NG                | NG               | 0.0007 S/m         | NG         |
| Kundu et al. <sup>4</sup> 2023       | One-step        | PA-66                         | 22        | 45.0              | 24.8             | 20 S/m             | NG         |
| Wang et al. <sup>5</sup> 2024        | One-step        | T/S fabric                    | 25        | 39.6              | 66.5             | NG                 | NG         |
| Zheng et al. <sup>6</sup> 2021       | One-step        | Cotton fabric                 | NG        | NG                | NG               | 134 $\Omega$       | NG         |
| Mao et al. <sup>7</sup> 2022         | LBL             | Cotton fabric                 | 32        | 63.0              | 31.4             | 142 S/m            | NG         |
| Liu et al. <sup>8</sup> 2024         | LBL             | Cotton fabric                 | NG        | NG                | NG               | 500 $\Omega$       | YES        |
| Liu et al. <sup>9</sup> 2019         | LBL             | Cotton fabric                 | 37.6      | NG                | NG               | 28 S/m             | NG         |
| Ma et al. <sup>10</sup> 2023         | LBL             | Cotton fabric                 | 36.7      | 74.4              | 62.4             | 125 S/m            | NG         |
| Rao et al. <sup>11</sup> 2021        | One-step        | Cotton fabric                 | 31        | 87                | 63.5             | 0                  | NO         |
| Qi et al. <sup>12</sup> 2023         | One-step        | Cotton fabric                 | 42        | 88.4              | 55.3             | 0                  | NO         |
| Chen et al. <sup>13</sup> 2023       | LBL             | Cotton fabric                 | 51.5      | 91.4              | 46.1             | 0                  | NO         |
| Luo et al. <sup>14</sup> 2022        | LBL             | Cotton fabric                 | 51        | 70.11             | 64.19            | 0                  | NO         |
| Lin et al. <sup>15</sup> 2019        | One-step        | Cotton fabric                 | NG        | 71                | 67.4             | 0                  | NO         |
| Chen et al. <sup>16</sup> 2020       | One-step        | Cellulose                     | NG        | 74                | 21.4             | 0                  | NO         |
| Xia et al. <sup>17</sup> 2022        | One-step        | Cotton fabric                 | 25        | 63.5              | 50               | NG                 | YES        |
| Shen et al. <sup>18</sup> 2024       | LBL             | Fabric wood                   | NG        | NG                | NG               | NG                 | YES        |
| Li et al. <sup>19</sup> 2022         | LBL             | Cotton fabric                 | 28.5      | 24                | 11               | 0                  | NO         |
| Ma et al. <sup>20</sup> 2022         | LBL             | Cotton fabric                 | 30.1      | 55.8              | 42               | 0                  | NO         |
| <b>Our work</b>                      | <b>One-step</b> | <b>Cotton fabric</b>          | <b>66</b> | <b>65.3</b>       | <b>50.4</b>      | <b>&gt;200 S/m</b> | <b>YES</b> |
|                                      |                 | <b>wood</b>                   | <b>64</b> | <b>37.6</b>       | <b>35.3</b>      | <b>&gt;667 S/m</b> |            |

Note: NG: not given.

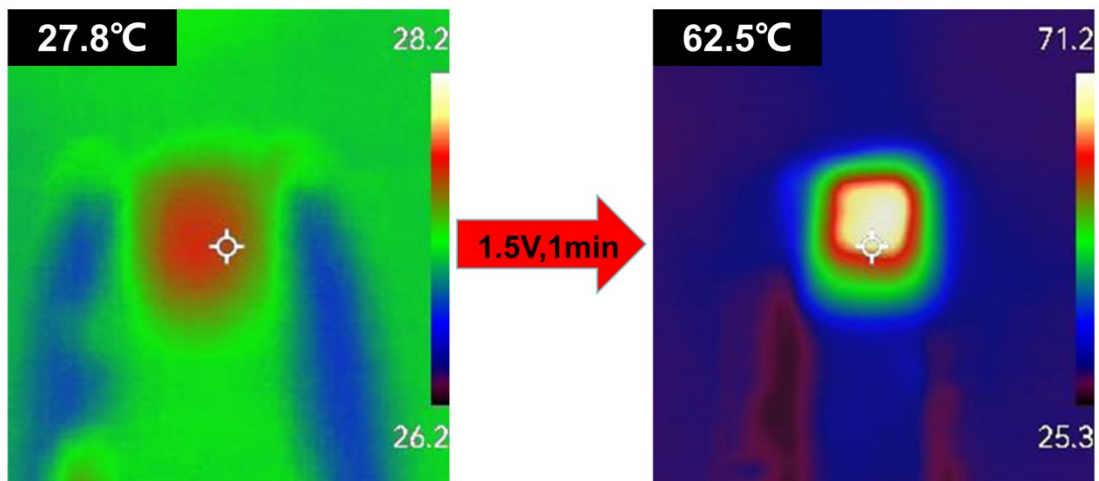

**Figure S3.** The thermoelectric effect of coated cotton fabric.

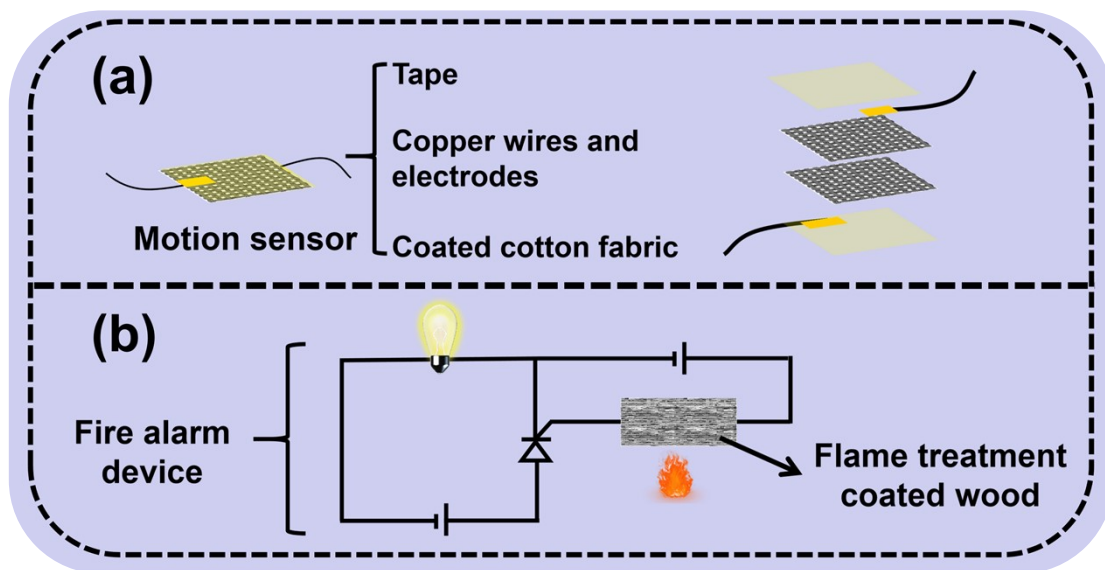

**Figure S4.** The manufacturing process of motion sensors (a) and fire alarm devices (b).

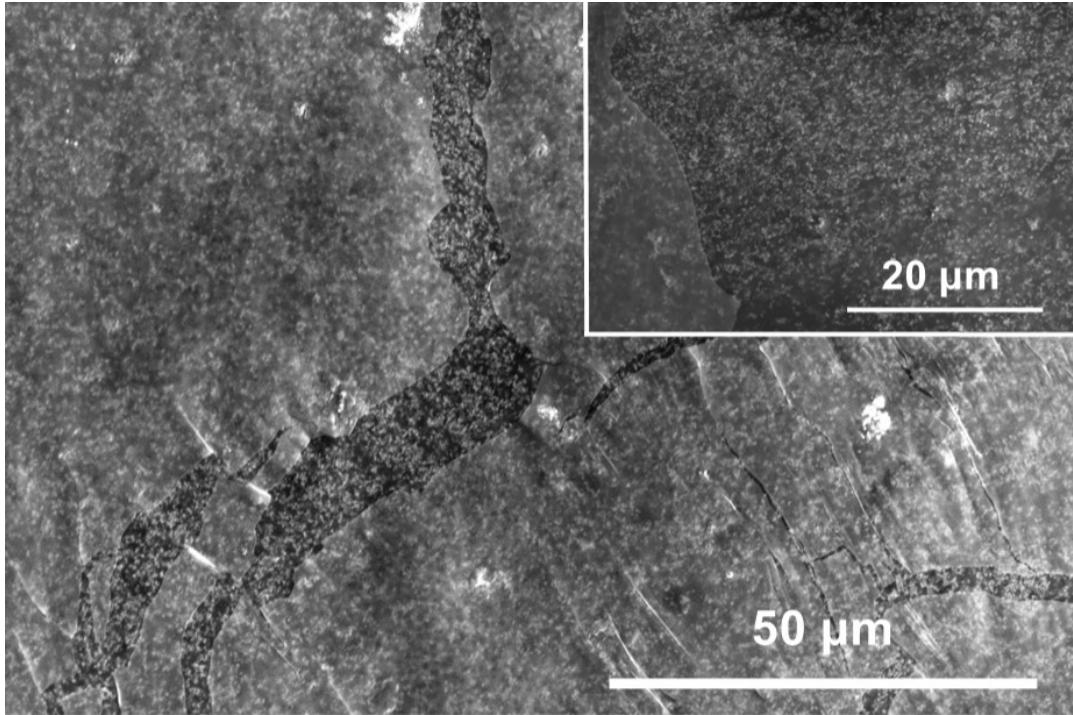

**Figure S5.** SEM images of APP-Ag gels.

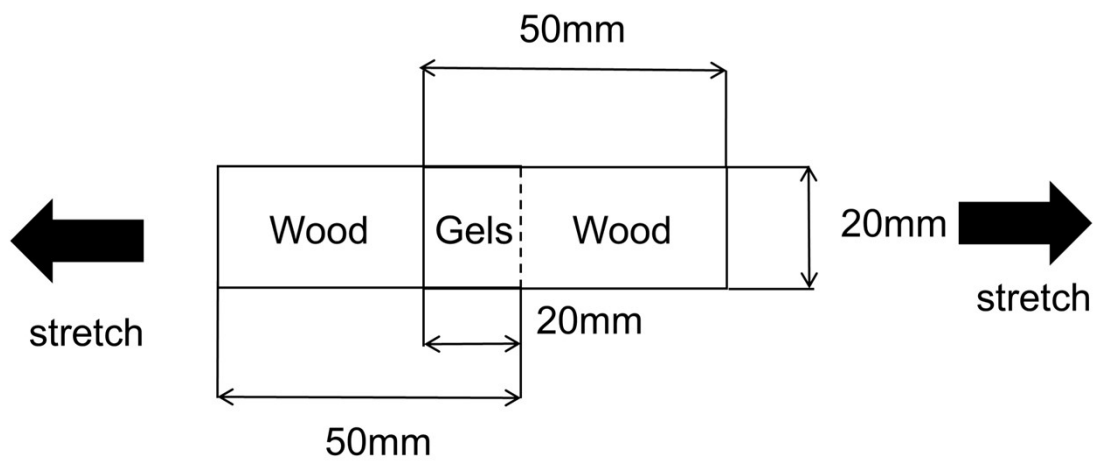

**Figure S6.** Illustration of the single-lap shear test.

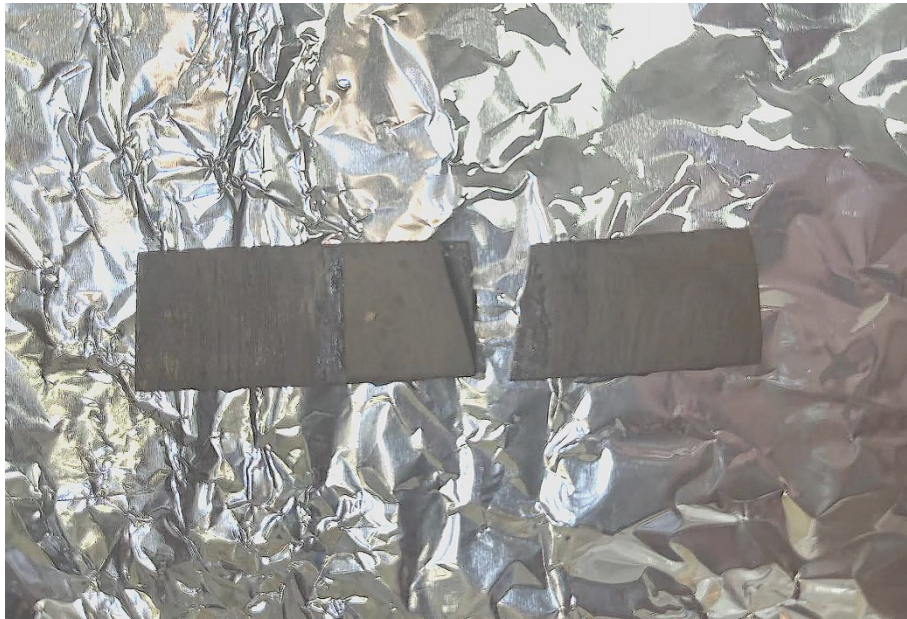

**Figure S7.** The wood after the single-lap shear test.

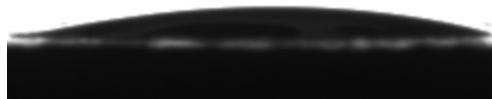

**Figure S8.** The hydrophilicity of APP-Ag gels.



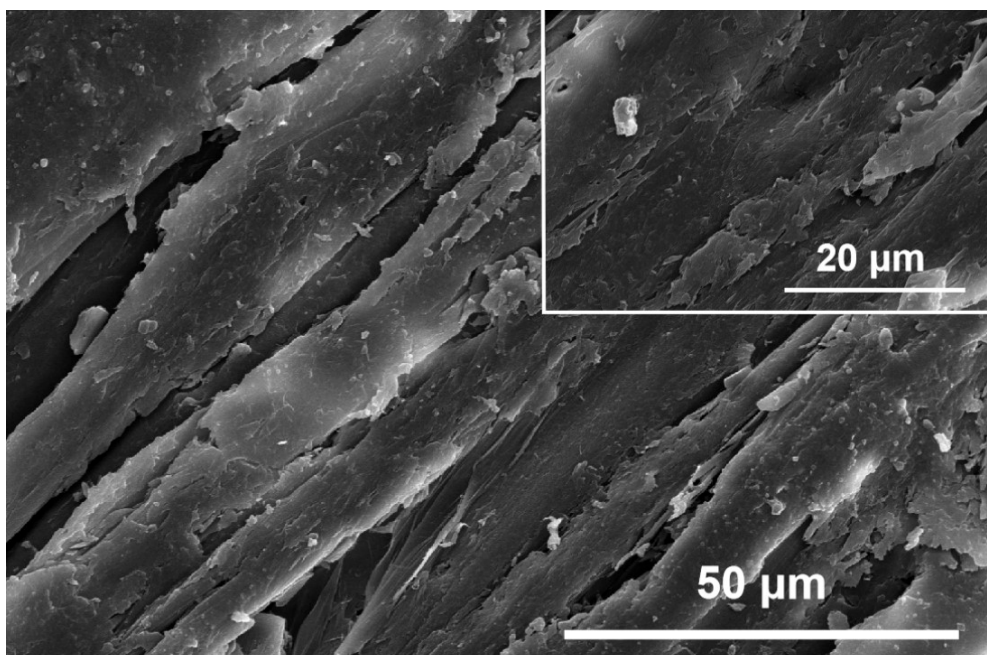

**Figure S9.** SEM images of the wood.

## References

1. Ding, L.; Sun, L.; Wang, Z.; Li, D.; Zhang, Q.; Liu, X.; Ren, Y.; Li, Y., Multifunctional 2D-3D heterogeneous MXene@ZIF-8 coated cotton/lyocell blended fabrics for fire protection, motion detection and UV-resistance. *Chem Eng J* **2023**, *474*, 145859.
2. Abdelkhalik, A.; Makhlof, G.; Ameen, H.; El-Wahab, H. A.; Elnaggar, E. M.; El-Gamal, A. A., A novel conductive nano-based flame-retardant coating: Preparation and its application for cotton fabric. *Prog Org Coat* **2024**, *194*, 108570.
3. Attia, N. F.; Zakria, A. M.; Nour, M. A.; Abd El-Ghany, N. A.; Elashery, S. E. A., Rational strategy for construction of multifunctional coatings for achieving high fire safety, antibacterial, UV protection and electrical conductivity functions of textile fabrics. *Materials Today Sustainability* **2023**, *23*, 100450.
4. Kundu, C. K.; Li, Z.; Khan, M. A. R.; Försth, M.; Das, O., Polypyrrole-modified multifunctional coatings for improved electro-conductive, hydrophilic and flame-retardant properties of polyamide 66 textiles. *J Coat Technol Res* **2023**, *20* (4), 1223-1234.
5. Wang, Z.-Y.; Cheng, X.-W.; Guan, J.-P.; Zhu, Y.-W.; Dong, X.; Chen, Z.; Wang, J.-J.; Xu, J.-J., UV protection, antistatic and flame-retardant multifunctional coating of polyester/spandex fabric with carbon black nanoparticles. *Polymer Degradation and Stability* **2024**, *220*, 110657.
6. Zheng, Y.; Yin, R.; Zhao, Y.; Liu, H.; Zhang, D.; Shi, X.; Zhang, B.; Liu, C.; Shen, C., Conductive MXene/cotton fabric based pressure sensor with both high sensitivity and wide sensing range for human motion detection and E-skin. *Chem Eng J* **2021**, *420*, 127720.
7. Mao, Y.; Wang, D.; Fu, S., Layer-by-layer self-assembled nanocoatings of Mxene and P, N-co-doped cellulose nanocrystals onto cotton fabrics for significantly reducing fire hazards and shielding

electromagnetic interference. *Composites Part A: Applied Science and Manufacturing* **2022**, *153*, 106751.

8. Liu, Q.; Li, J.; He, J.; Mu, L.; Xue, Y.; Zhao, Y.; Liu, H.; Sun, C.-L.; Qu, M., Ultrahigh moisture resistance, highly sensitive and flame retardancy wearable strain sensor for agile water rescue, fire alarm and human motion detection. *Chem Eng J* **2024**, *479*, 147706.

9. Liu, Z.; Shang, S.; Chiu, K.-I.; Jiang, S.; Dai, F., Fabrication of conductive and flame-retardant bifunctional cotton fabric by polymerizing pyrrole and doping phytic acid. *Polymer Degradation and Stability* **2019**, *167*, 277-282.

10. Ma, Z.; Zhang, Z.; Wang, C.; Zhou, Z.; Huang, J.; Wang, Y., Construction of green versatile coating integrating fireproof, electric-conduction and self-cleaning performance for cotton fabrics. *Appl Surf Sci* **2023**, *637*, 157862.

11. Rao, W.; Shi, J.; Yu, C.; Zhao, H.-B.; Wang, Y.-Z., Highly efficient, transparent, and environment-friendly flame-retardant coating for cotton fabric. *Chem Eng J* **2021**, *424*, 130556.

12. Qi, P.; Li, Y.; Yao, Y.; Sun, J.; Li, L.; Liu, J.; Gu, X.; Li, H.; Zhang, S., Ultra washing durable flame retardant coating for cotton fabric by the covalent bonding and interface polymerization. *Chem Eng J* **2023**, *452*, 139453.

13. Chen, F.; Qi, P.; Liu, J.; Xia, G.; Fei, B.; Sun, J.; Xin, J. H.; Zhang, S., Rationally designed lentinan outer layer to improve the comprehensive performance of flame-retardant cotton fabrics. *Chem Eng J* **2023**, *476*, 146427.

14. Luo, X.; Li, Z.; Shen, J.; Liu, L.; Chen, H.; Hu, Z.; Krucinska, I.; Yao, J., A facile strategy to achieve efficient flame-retardant cotton fabric with durable and restorable fire resistance. *Chem Eng J* **2022**, *430*, 132854.

15. Lin, D.; Zeng, X.; Li, H.; Lai, X.; Wu, T., One-pot fabrication of superhydrophobic and flame-retardant coatings on cotton fabrics via sol-gel reaction. *J Colloid Interf Sci* **2019**, *533*, 198-206.

16. Chen, Z.; Xiao, P.; Zhang, J.; Tian, W.; Jia, R.; Nawaz, H.; Jin, K.; Zhang, J., A facile strategy to fabricate cellulose-based, flame-retardant, transparent and anti-dripping protective coatings. *Chem Eng J* **2020**, *379*, 122270.

17. Xia, L.; Lv, Y.; Miao, Z.; Luo, L.; Luo, W.; Xu, Y.; Yuan, C.; Zeng, B.; Dai, L., A flame retardant fabric nanocoating based on nanocarbon black particles@polymer composite and its fire-alarm application. *Chem Eng J* **2022**, *433*, 133501.

18. Shen, Y.-B.; Yu, K.-X.; Wang, Y.-J.; Qu, Y.-H.; Pan, L.-Q.; Cao, C.-F.; Cao, K.; Gao, J.-F.; Shi, Y.; Song, P.; Yong, J.; Hong, M.; Zhang, G.-D.; Zhao, L.; Tang, L.-C., Color adjustable, mechanically robust, flame-retardant and weather-resistant TiO<sub>2</sub>/MMT/CNF hierarchical nanocomposite coatings toward intelligent fire cyclic warning and protection. *Composites Part B: Engineering* **2024**, *271*, 111159.

19. Li, C.-B.; Wang, F.; Sun, R.-Y.; Nie, W.-C.; Song, F.; Wang, Y.-Z., A multifunctional coating towards superhydrophobicity, flame retardancy and antibacterial performances. *Chem Eng J* **2022**, *450*, 138031.

20. Ma, Z.; Zhang, Z.; Zhao, F.; Wang, Y., A multifunctional coating for cotton fabrics integrating superior performance of flame-retardant and self-cleaning. *Advanced Composites and Hybrid Materials* **2022**, *5* (4), 2817-2833.
